# Supplementary material for: Latest developments in the synthesis of metal–organic frameworks and their hybrids for hydrogen storage
Source: Royal Society of Chemistry journal article supplement (doi:10.1039/d4nr03969f), 2025-01-01
Supplement: d4nr03969f1.pdf [file d4nr03969f1.pdf]

## Supplementary Information

### **Latest Developments in the Synthesis of Metal-Organic Frameworks and their Hybrids for Hydrogen Storage**

Laura Jimenez Lopez <sup>a</sup>, Leandro Goulart de Araujo<sup>a</sup>, Rafael Morales-Ospino <sup>a</sup>,  
Alain Celzard<sup>a,b</sup>, Vanessa Fierro<sup>a</sup>

*<sup>a</sup> Université de Lorraine, CNRS, IJL, F-88000 Epinal, France*

*<sup>b</sup> Institut Universitaire de France (IUF), F-75231 Paris, France*

\* Corresponding author. Tel: + 33 372 74 96 77.

Fax: + 33 372 74 96 38.

E-mail address: [Vanessa.Fierro@univ-lorraine.fr](mailto:Vanessa.Fierro@univ-lorraine.fr) (V. Fierro)

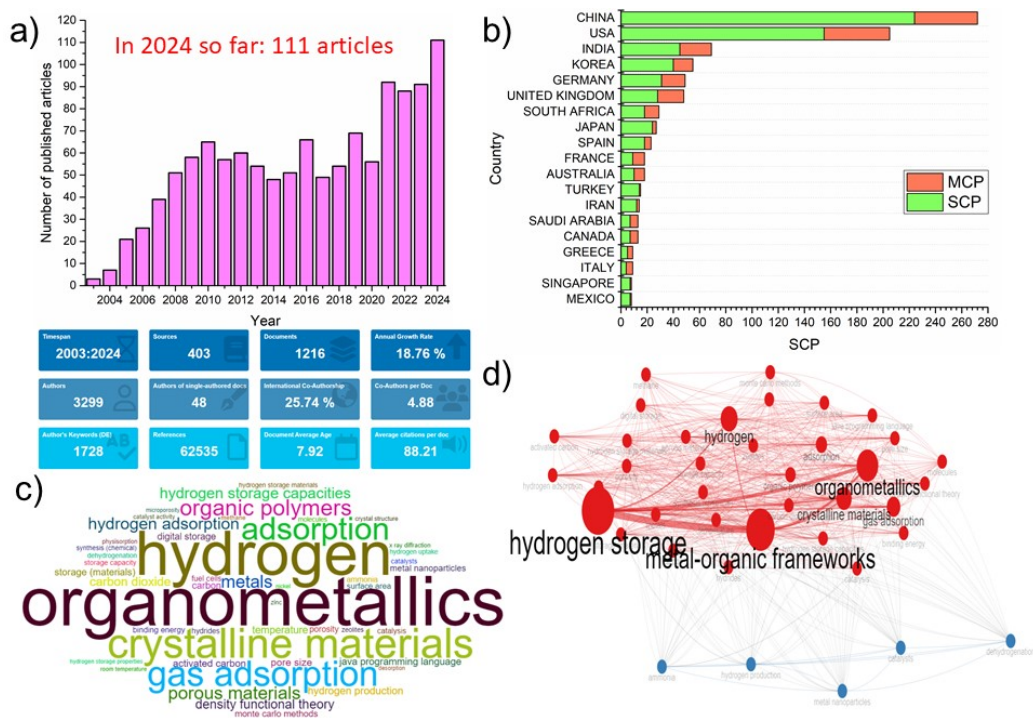

**Figure S1:** Bibliometric analysis on “metal-organic framework” AND “hydrogen storage”: a) Number of articles published over the years (top figure) and general information (bottom figure); b) Corresponding author's country (MCP: inter-country, SCP: intra-country); c) WordCloud; d) co-occurrence network (number of nodes:30, clustering algorithm: walktrap, normalization: association, repulsion force: 0.1, remove isolated nodes: yes, minimum number of edges: 2).

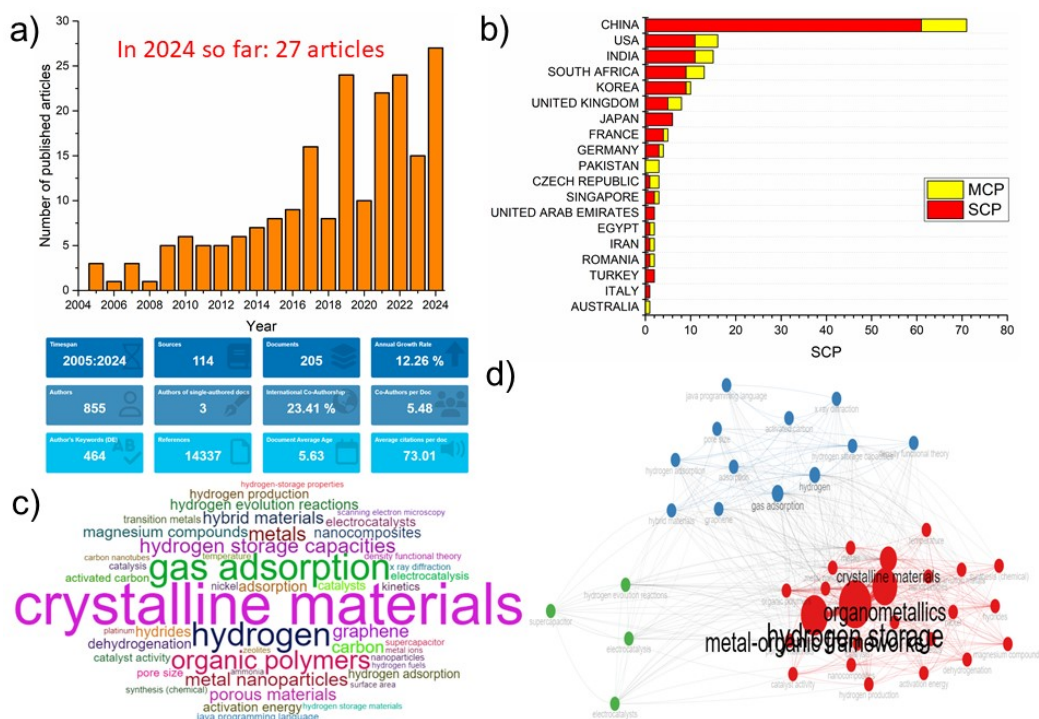

**Figure S2:** Bibliometric analysis on “metal-organic framework” AND “hydrogen storage” AND (“hybrid” OR “composite”): a) Number of articles published over the years (top figure) and general information (bottom figure); b) Corresponding author's country (MCP: inter-country, SCP: intra-country); c) WordCloud; d) co-occurrence network (number of nodes:25, clustering algorithm: walktrap, normalization: association, repulsion force: 0.1, remove isolated nodes: yes, minimum number of edges: 2).

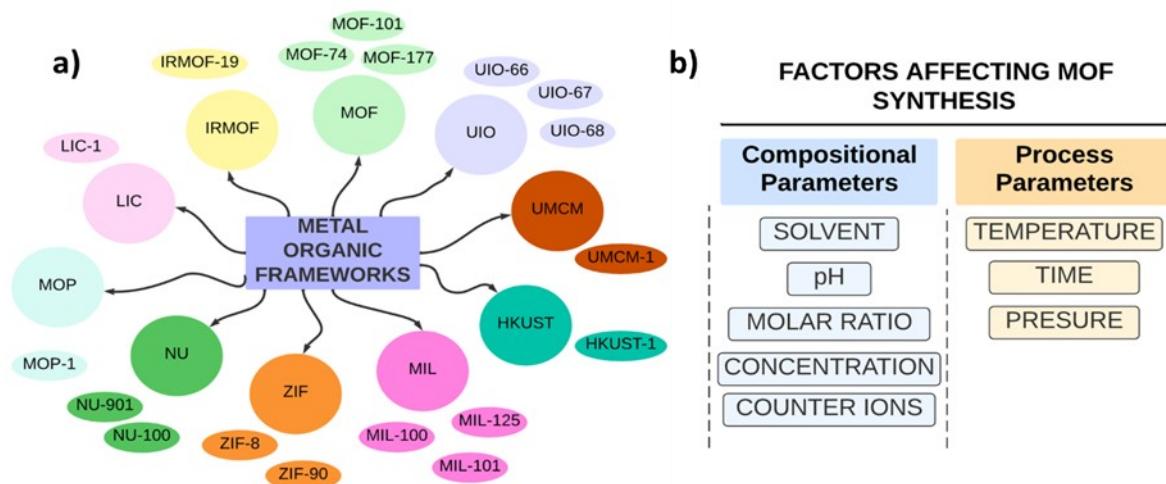

**Figure S3:** a) Scheme of the different MOF groups with typical examples; b) parameters influencing MOF formation (adapted from Ref (1)).

**Table S1:** General MOF groups and examples of with typical materials.

| General name group                                    | Designation        | Formula                                                         | REF  |
|-------------------------------------------------------|--------------------|-----------------------------------------------------------------|------|
| <b>Metal-Organic framework</b>                        |                    |                                                                 |      |
|                                                       | MOF-74             | $Zn_2(dobdc)$                                                   | (2)  |
|                                                       | MOF-101            | $Cu_2(Br-BDC)_2(H_2O)_2$                                        | (3)  |
|                                                       | MOF-177            | $Zn_4O(BTB)_2$                                                  | (4)  |
| <b>IsoReticular Metal-Organic framework</b>           |                    |                                                                 |      |
|                                                       | IRMOF-1 (MOF-5)    | $Zn_4O(BDC)_3$                                                  | (5)  |
| <b>Universitetet i Oslo</b>                           |                    |                                                                 |      |
|                                                       | UIO-66             | $Zr_6O_6(OH)_4(BDC)_6$                                          | (6)  |
|                                                       | UIO-67             | $Zr_6O_6(OH)_4(BPDC)_6$                                         | (7)  |
|                                                       | UIO-68             | $Zr_6O_6(OH)_4(TPDC)_6$                                         | (8)  |
| <b>Northwestern University</b>                        |                    |                                                                 |      |
|                                                       | NU-109             | $Cu_3(L6^{-1}_{(109)})(H_2O)_3$                                 | (9)  |
| <b>Materials of Institut Lavoiser</b>                 |                    |                                                                 |      |
|                                                       | MIL-125            | $Ti_8O_8(OH)_4(BDC)$                                            | (10) |
|                                                       | MIL-100            | $Fe_3O(H_2O)_2OH(BTC)_2$                                        | (11) |
|                                                       | MIL-101            | $Cr_3O(BDC)_3(H_2O)_2$                                          | (12) |
| <b>Hong Kong University of Science and Technology</b> |                    |                                                                 |      |
|                                                       | HKUST-1 (IRMOF-19) | $Cu_3(BTC)_2$                                                   | (13) |
| <b>Zeolite Imidazolate Framework</b>                  |                    |                                                                 |      |
|                                                       | ZIF-8              | $Zn(MIM)_2$                                                     | (14) |
| <b>Leiden Institute of Chemistry</b>                  |                    |                                                                 |      |
|                                                       | LIC-1              | $Gd_2(N-BDC)_3(DMF)_4$                                          | (15) |
| <b>Metal-Organic Polyhedra</b>                        |                    |                                                                 |      |
|                                                       | MOP-1              | $Cu_{24}(1,3-BDC)_{24}(DMF)_{14}(H_2O)_{60}(DMF)_6(C_2H_5OH)_6$ | (16) |
| <b>University of Michigan Crystalline Material</b>    |                    |                                                                 |      |
|                                                       | UMCM-1             | $Zn_4O(BTB)_3(BDC)$                                             | (17) |

## References:

1. Seetharaj R, Vandana PV, Arya P, Mathew S. Dependence of solvents, pH, molar ratio and temperature in tuning metal organic framework architecture. *Arabian Journal of Chemistry*. 2019 Mar 1;12(3):295–315.
2. Yang H, Peng F, Dang C, Wang Y, Hu D, Zhao X, et al. Ligand Charge Separation To Build Highly Stable Quasi-Isomer of MOF-74-Zn. *J Am Chem Soc*. 2019 Jun 26;141(25):9808–12.
3. Eddaoudi M, Kim J, O’Keeffe M, Yaghi OM. Cu<sub>2</sub>[o-Br-C<sub>6</sub>H<sub>3</sub>(CO<sub>2</sub>)<sub>2</sub>]<sub>2</sub>(H<sub>2</sub>O)<sub>2</sub>·(DMF)<sub>8</sub>(H<sub>2</sub>O)<sub>2</sub>: A Framework Deliberately Designed To Have the NbO Structure Type. *J Am Chem Soc*. 2002 Jan 1;124(3):376–7.
4. Saha D, Deng S. Structural Stability of Metal Organic Framework MOF-177. *J Phys Chem Lett*. 2010 Jan 7;1(1):73–8.
5. McKinstry C, Cathcart RJ, Cussen EJ, Fletcher AJ, Patwardhan SV, Sefcik J. Scalable continuous solvothermal synthesis of metal organic framework (MOF-5) crystals. *Chemical Engineering Journal*. 2016 Feb 1;285:718–25.
6. Liang W, J. Coghlan C, Ragon F, Rubio-Martinez M, M. D’Alessandro D, Babarao R. Defect engineering of UiO-66 for CO<sub>2</sub> and H<sub>2</sub>O uptake – a combined experimental and simulation study. *Dalton Transactions*. 2016;45(11):4496–500.
7. Larabi C, Quadrelli EA. Titration of Zr<sub>3</sub>(μ-OH) Hydroxy Groups at the Cornerstones of Bulk MOF UiO-67, [Zr<sub>6</sub>O<sub>4</sub>(OH)<sub>4</sub>(biphenyldicarboxylate)<sub>6</sub>], and Their Reaction with [AuMe(PMe<sub>3</sub>)]. *European Journal of Inorganic Chemistry*. 2012;2012(18):3014–22.
8. Ye X, Liu D. Metal–Organic Framework UiO-68 and Its Derivatives with Sufficiently Good Properties and Performance Show Promising Prospects in Potential Industrial Applications. *Crystal Growth & Design*. 2021 Aug 4;21(8):4780–804.
9. Farha OK, Eryazici I, Jeong NC, Hauser BG, Wilmer CE, Sarjeant AA, et al. Metal–Organic Framework Materials with Ultrahigh Surface Areas: Is the Sky the Limit? *J Am Chem Soc*. 2012 Sep 12;134(36):15016–21.
10. Abdelhameed RM, Simões MMQ, Silva AMS, Rocha J. Enhanced Photocatalytic Activity of MIL-125 by Post-Synthetic Modification with Cr<sup>III</sup> and Ag Nanoparticles. *Chemistry – A European Journal*. 2015;21(31):11072–81.
11. Feng X, Qin M, Cui S, Rode C. Metal-organic framework MIL-100(Fe) as a novel moisture buffer material for energy-efficient indoor humidity control. *Building and Environment*. 2018 Nov 1;145:234–42.
12. Zou M, Dong M, Zhao T. Advances in Metal-Organic Frameworks MIL-101(Cr). *International Journal of Molecular Sciences*. 2022 Jan;23(16):9396.
13. Tranchemontagne DJ, Hunt JR, Yaghi OM. Room temperature synthesis of metal-organic frameworks: MOF-5, MOF-74, MOF-177, MOF-199, and IRMOF-0. *Tetrahedron*. 2008 Sep 1;64(36):8553–7.
14. Bergaoui M, Khalfaoui M, Awadallah-F A, Al-Muhtaseb S. A review of the features and applications of ZIF-8 and its derivatives for separating CO<sub>2</sub> and isomers of C<sub>3</sub>- and C<sub>4</sub>-hydrocarbons. *Journal of Natural Gas Science and Engineering*. 2021 Dec 1;96:104289.
15. Costa JS, Gamez P, Black CA, Roubeau O, Teat SJ, Reedijk J. Chemical Modification of a Bridging Ligand Inside a Metal–Organic Framework while Maintaining the 3D Structure. *European Journal of Inorganic Chemistry*. 2008 Apr;2008(10):1551–4.

16. Guillerm V, Kim D, Eubank JF, Luebke R, Liu X, Adil K, et al. A supermolecular building approach for the design and construction of metal–organic frameworks. *Chem Soc Rev*. 2014 Jul 22;43(16):6141–72.
17. Xiang Z, Fang C, Leng S, Cao D. An amino group functionalized metal–organic framework as a luminescent probe for highly selective sensing of Fe<sup>3+</sup> ions. *J Mater Chem A*. 2014 May 6;2(21):7662–5.
